# Supplementary material for: Energetically favoured defects in dense packings of particles on spherical surfaces
Source: Royal Society of Chemistry journal article supplement (doi:10.1039/c6sm00489j), 2016-01-01
Supplement: c6sm00489j1.pdf [file c6sm00489j1.pdf]

# Supporting Information for Energetically favoured defects in dense packings of particles on spherical surfaces

Stefan Paquay<sup>1</sup>, Halim Kusumaatmaja<sup>2</sup>, David J. Wales<sup>3</sup>, Roya  
Zandi<sup>4</sup>, and Paul van der Schoot<sup>1,5</sup>

<sup>1</sup>Department of Applied Physics, Technische Universiteit  
Eindhoven, The Netherlands

<sup>2</sup>Department of Physics, University of Durham, UK

<sup>3</sup>Department of Chemistry, University of Cambridge, UK

<sup>4</sup>Department of Physics and Astronomy, University of California,  
Riverside, USA

<sup>5</sup>Instituut voor Theoretische Fysica, Universiteit Utrecht, The  
Netherlands

## **S 1 Optimal sphere radius and energy**

In this section we present our results for the optimal sphere radius  $R^*$  and the corresponding energies that are described in Section 2. We also show the optimal Lennard-Jones radii and energies reported by Voogd in (1). They are located in Tab. S 1. Our values are obtained from simulations in which the radius of the spherical template slowly shrinks over a range estimated from hard disk packings in 2D that presumably contains the optimal radius. Note that our

radii for the Lennard-Jones packing do not improve upon Voogd's values, they are in the correct ballpark, with the largest difference in the radius being 2%. Thus, our strategy provides a good way to obtain a first order estimate for the optimal radius on which more intensive optimisation can be performed.

Table S 1: Optimal radii and corresponding potential energy for Lennard-Jones particles and Morse particles with shape parameter  $\alpha = 60/r_0$ , where  $r_0$  is the distance at which the pair potential has its minimum.

| $N$ | $R_{LJ}^*/r_0$ | $U_{LJ}/N/\epsilon$ | $R_{LJ}^*/r_0$ (Voogd) | $U_{LJ}/N/\epsilon$ (Voogd) | $R_M^*/r_0$ | $U_M^*/N/\epsilon$ |
|-----|----------------|---------------------|------------------------|-----------------------------|-------------|--------------------|
| 10  | 0.904877       | -2.386829           | 0.897777352534         | -2.391701447066             | 0.951257    | -2.099895          |
| 11  | 0.940335       | -2.546418           | 0.940905005832         | -2.546447320801             | 0.950446    | -2.268700          |
| 12  | 0.936682       | -2.795960           | 0.942373155294         | -2.799795573727             | 0.951435    | -2.498530          |
| 13  | 1.022253       | -2.448824           | 1.023669635577         | -2.448969977079             | 1.090487    | -1.966043          |
| 14  | 1.051020       | -2.532894           | 1.053553039689         | -2.533348412369             | 1.070727    | -1.999874          |
| 15  | 1.077747       | -2.604019           | 1.079511939730         | -2.604254157791             | 1.107120    | -1.996530          |
| 16  | 1.113089       | -2.629181           | 1.111359350373         | -2.629397082119             | 1.135076    | -1.997704          |
| 17  | 1.136519       | -2.729079           | 1.134715561189         | -2.729322104280             | 1.177153    | -2.108171          |
| 18  | 1.169474       | -2.720606           | 1.168431468281         | -2.720681589556             | 1.192575    | -2.143180          |
| 19  | 1.212959       | -2.692581           | 1.212803380000         | -2.692582368658             | 1.246011    | -2.162748          |
| 20  | 1.220995       | -2.812968           | 1.221102153780         | -2.812968910809             | 1.243276    | -2.238600          |
| 21  | 1.263170       | -2.759161           | 1.256842828104         | -2.761570772616             | 1.290012    | -2.033690          |
| 22  | 1.280587       | -2.813962           | 1.278935841127         | -2.814127147712             | 1.345578    | -2.309422          |
| 23  | 1.321960       | -2.798679           | 1.323636299622         | -2.798822415653             | 1.344108    | -2.390687          |
| 24  | 1.337533       | -2.916111           | 1.325942483975         | -2.923589586974             | 1.343885    | -2.499904          |
| 25  | 1.365106       | -2.789403           | 1.370215612837         | -2.790744681095             | 1.409161    | -2.143061          |
| 26  | 1.405526       | -2.831581           | 1.393253846649         | -2.838736266635             | 1.426258    | -2.064923          |
| 27  | 1.405019       | -2.915403           | 1.405226921913         | -2.915404947140             | 1.438392    | -2.174199          |
| 28  | 1.444699       | -2.834263           | 1.441037402745         | -2.834795918128             | 1.486233    | -2.109257          |
| 29  | 1.470268       | -2.836935           | 1.470703678855         | -2.836943974529             | 1.506661    | -2.157828          |
| 30  | 1.481021       | -2.907705           | 1.482942826361         | -2.907879985814             | 1.512497    | -2.264060          |

*Continued on next page*

Table S 1 – *Continued from previous page*

| $N$ | $R_{LJ}^*/r_0$ | $U_{LJ}/N/\epsilon$ | $R_{LJ}^*/r_0$ (Voogd) | $U_{LJ}/N/\epsilon$ (Voogd) | $R_M^*/r_0$ | $U_M^*/N/\epsilon$ |
|-----|----------------|---------------------|------------------------|-----------------------------|-------------|--------------------|
| 31  | 1.505503       | -2.914502           | 1.508252602796         | -2.914845518606             | 1.569113    | -2.171004          |
| 32  | 1.529593       | -2.973958           | 1.517799565208         | -2.980094374797             | 1.556748    | -2.156241          |
| 33  | 1.553309       | -2.851437           | 1.565483089900         | -2.857364512086             | 1.607324    | -2.090012          |
| 34  | 1.576668       | -2.879003           | 1.581507917153         | -2.879973993426             | 1.663424    | -2.215261          |
| 35  | 1.615217       | -2.892769           | 1.603568457619         | -2.897476940815             | 1.650354    | -2.254401          |
| 36  | 1.622380       | -2.926064           | 1.621869926831         | -2.926074652855             | 1.651993    | -2.304795          |
| 37  | 1.660724       | -2.902360           | 1.645689466050         | -2.907674813755             | 1.689376    | -2.167760          |
| 38  | 1.666836       | -2.970314           | 1.659845132456         | -2.972138629420             | 1.734758    | -2.155274          |
| 39  | 1.688627       | -2.913506           | 1.689160940137         | -2.913516422414             | 1.736032    | -2.163549          |
| 40  | 1.710142       | -2.935197           | 1.708230437867         | -2.935326506885             | 1.752469    | -2.195959          |
| 41  | 1.731381       | -2.929093           | 1.729343588049         | -2.929234832467             | 1.774234    | -2.146127          |
| 42  | 1.752371       | -2.957193           | 1.752712826656         | -2.957197169053             | 1.809763    | -2.265107          |
| 43  | 1.773111       | -2.985056           | 1.765631923177         | -2.986878602028             | 1.809023    | -2.237259          |
| 44  | 1.776194       | -3.038971           | 1.773591356738         | -3.039204045422             | 1.813941    | -2.271814          |
| 45  | 1.796266       | -2.988776           | 1.801077961986         | -2.989550533032             | 1.882977    | -2.388847          |
| 46  | 1.833924       | -2.967809           | 1.831567835991         | -2.967979946789             | 1.873818    | -2.265579          |
| 47  | 1.835750       | -2.988661           | 1.845624666183         | -2.991666695750             | 1.883939    | -2.442927          |
| 48  | 1.855172       | -3.043492           | 1.852527998434         | -3.043710551686             | 1.884393    | -2.498348          |
| 49  | 1.892777       | -2.959511           | 1.884936044669         | -2.961259366808             | 1.937731    | -2.177288          |
| 50  | 1.893427       | -2.983355           | 1.899868057549         | -2.984583094281             | 1.947870    | -2.204567          |
| 51  | 1.912270       | -2.991444           | 1.916517435225         | -2.991978366226             | 1.974846    | -2.198855          |
| 52  | 1.949857       | -2.984952           | 1.937974048925         | -2.988779822952             | 1.984468    | -2.187915          |
| 53  | 1.949402       | -2.970368           | 1.961895379520         | -2.974816531472             | 2.009351    | -2.195769          |
| 54  | 1.967710       | -3.007974           | 1.971909776092         | -3.008467736524             | 2.016416    | -2.273019          |
| 55  | 2.005315       | -2.972047           | 1.997949144047         | -2.973425131693             | 2.052942    | -2.222675          |
| 56  | 2.003818       | -3.005524           | 2.007994951024         | -3.005994640032             | 2.056417    | -2.243726          |
| 57  | 2.021627       | -2.993537           | 2.027327589626         | -2.994392848924             | 2.081772    | -2.257658          |

*Continued on next page*

Table S 1 – *Continued from previous page*

| $N$ | $R_{LJ}^*/r_0$ | $U_{LJ}/N/\epsilon$ | $R_{LJ}^*/r_0$ (Voogd) | $U_{LJ}/N/\epsilon$ (Voogd) | $R_M^*/r_0$ | $U_M^*/N/\epsilon$ |
|-----|----------------|---------------------|------------------------|-----------------------------|-------------|--------------------|
| 58  | 2.059277       | -2.991903           | 2.044677513303         | -2.997051140312             | 2.099946    | -2.252599          |
| 59  | 2.056791       | -3.009671           | 2.060451925427         | -3.010013049113             | 2.116954    | -2.302388          |
| 60  | 2.074146       | -3.032748           | 2.072914876984         | -3.032786493941             | 2.127555    | -2.282841          |
| 61  | 2.091367       | -3.004137           | 2.099984988857         | -3.005979486010             | 2.156723    | -2.251880          |
| 62  | 2.108437       | -3.021133           | 2.109459052546         | -3.021158756038             | 2.165891    | -2.216732          |
| 63  | 2.125373       | -3.022027           | 2.125802560541         | -3.022031670944             | 2.181170    | -2.228638          |
| 64  | 2.142175       | -3.020690           | 2.143018548376         | -3.020706178561             | 2.203763    | -2.233371          |
| 65  | 2.180011       | -3.014365           | 2.159849647419         | -3.023038735530             | 2.218712    | -2.252606          |
| 66  | 2.175388       | -3.034738           | 2.173766775635         | -3.034797798662             | 2.228147    | -2.242949          |
| 67  | 2.191807       | -3.033152           | 2.190095552387         | -3.033218086182             | 2.257012    | -2.223577          |
| 68  | 2.229750       | -3.009600           | 2.212957714507         | -3.015064415231             | 2.269333    | -2.223757          |
| 69  | 2.224280       | -3.034493           | 2.221952321872         | -3.034610208058             | 2.279338    | -2.228245          |
| 70  | 2.240334       | -3.042208           | 2.236128944654         | -3.042587333370             | 2.296906    | -2.255365          |
| 71  | 2.256281       | -3.047856           | 2.253609149146         | -3.048006785146             | 2.317771    | -2.299356          |
| 72  | 2.272121       | -3.056438           | 2.264321813954         | -3.057702042394             | 2.316996    | -2.325058          |
| 73  | 2.287837       | -3.019305           | 2.292383040075         | -3.019407304510             | 2.352293    | -2.226592          |
| 74  | 2.303454       | -3.030862           | 2.303497514639         | -3.030862374611             | 2.366227    | -2.242038          |
| 75  | 2.318974       | -3.044339           | 2.315406949106         | -3.044593521226             | 2.375216    | -2.212863          |
| 76  | 2.334377       | -3.043228           | 2.332264011995         | -3.043315920487             | 2.395653    | -2.245938          |
| 77  | 2.349683       | -3.051799           | 2.342682708578         | -3.052751366791             | 2.405489    | -2.261926          |
| 78  | 2.364891       | -3.067158           | 2.355651081550         | -3.068799176877             | 2.410416    | -2.237785          |
| 79  | 2.380009       | -3.046926           | 2.373368483194         | -3.047756931955             | 2.447245    | -2.252494          |
| 80  | 2.395021       | -3.053943           | 2.387441437503         | -3.055012900626             | 2.449508    | -1.902176          |
| 81  | 2.409943       | -3.040082           | 2.405496835696         | -3.040443111613             | 2.470801    | -2.195361          |
| 82  | 2.424777       | -3.036470           | 2.421820588972         | -3.036629161026             | 2.492485    | -2.259488          |
| 83  | 2.439512       | -3.039338           | 2.434795696871         | -3.039736810517             | 2.501109    | -2.328417          |
| 84  | 2.454168       | -3.051290           | 2.448182481981         | -3.051926932936             | 2.500183    | -2.345918          |

*Continued on next page*

Table S 1 – *Continued from previous page*

| $N$ | $R_{LJ}^*/r_0$ | $U_{LJ}/N/\epsilon$ | $R_{LJ}^*/r_0$ (Voogd) | $U_{LJ}/N/\epsilon$ (Voogd) | $R_M^*/r_0$ | $U_M^*/N/\epsilon$ |
|-----|----------------|---------------------|------------------------|-----------------------------|-------------|--------------------|
| 85  | 2.468734       | -3.041139           | 2.464409004970         | -3.041467105409             | 2.529841    | -2.209913          |
| 86  | 2.483211       | -3.044077           | 2.478604188594         | -3.044445037863             | 2.544674    | -2.224230          |
| 87  | 2.497608       | -3.048261           | 2.493077153951         | -3.048615801156             | 2.555677    | -2.204192          |
| 88  | 2.511916       | -3.058038           | 2.504241465416         | -3.059034645237             | 2.571579    | -2.265073          |
| 89  | 2.526152       | -3.053892           | 2.519344738182         | -3.054668510385             | 2.582359    | -2.252085          |
| 90  | 2.540300       | -3.049875           | 2.540613112184         | -3.049877137472             | 2.606983    | -2.251916          |
| 91  | 2.554376       | -3.052519           | 2.551677109091         | -3.052638760612             | 2.617603    | -2.210665          |
| 92  | 2.568372       | -3.067097           | 2.559448724569         | -3.068391387274             | 2.616534    | -2.281080          |
| 93  | 2.582297       | -3.061326           | 2.578325483646         | -3.061580134667             | 2.644918    | -2.250411          |
| 94  | 2.596141       | -3.069246           | 2.588610373792         | -3.070146514964             | 2.651315    | -2.127731          |
| 95  | 2.609915       | -3.070577           | 2.600111381806         | -3.072084399989             | 2.669293    | -2.297233          |
| 96  | 2.623617       | -3.078376           | 2.609596703568         | -3.081425625804             | 2.678059    | -2.287996          |
| 97  | 2.637247       | -3.074433           | 2.626721288869         | -3.076135067207             | 2.695931    | -2.298052          |
| 98  | 2.650807       | -3.087128           | 2.635565739021         | -3.090663894976             | 2.697864    | -2.282845          |
| 99  | 2.664295       | -3.066456           | 2.653858334618         | -3.068095087771             | 2.727576    | -2.205642          |
| 100 | 2.677712       | -3.072264           | 2.663546522523         | -3.075249310690             | 2.743986    | -2.232190          |

## S 2 Problems associated with Voronoi tessellation

In a 3D Voronoi construction, the entire simulation volume  $V$  is divided into  $N$  polyhedra with volume  $V_i$ , one for each particle  $i = 1, \dots, N$  (a Voronoi tessellation). Each volume  $V_i$  consists of all points  $\mathbf{x}$  that are closer to the position of particle  $\mathbf{x}_i$  than to any other particle. Although our particles only have access to a two-dimensional subspace of  $\mathbb{R}^3$ , they live in a three-dimensional Cartesian space, so it is still possible to assign the aforementioned volumes to

them. The number of faces of each polyhedron is then the number of nearest neighbours of each particle, and a connectivity network can be generated by connecting all particles whose polyhedra share a face.

The network generated by the tessellation covers the entire space, and thus automatically has the correct Euler characteristic. For particles on a sphere, one should generate the equivalent of the three-dimensional Voronoi tessellation on the spherical surface. This can be done by determining the convex hull of the points (2), for which we employ the CGAL software library. (3) This produces a partitioning of the sphere surface where again each point is assigned to the particle that is closest to in geodesic sense.

Such a construction is very natural for hexagonal lattices, as the generated polyhedra are hexagons as well, and they are fairly robust against thermal fluctuations. An issue arises when particles are packed in other types of lattice, however. For example, in a perfectly square lattice, the Voronoi tessellation is degenerate because the cubes around the particles have touching edges and vertices. A small thermal fluctuation will generate an additional face in two of the polyhedra, resulting in either one pair or the other being counted as neighbours, even though the packing should be considered square instead of hexagonal.(4) Based on previous works (5, 6) we anticipated such problems and hence opted for the distance criterion instead.

We present here Fig. S 1 as a clear illustration of a packing for which the Voronoi construction is degenerate. It is an octahedral (7) packing of Lennard-Jones particles that corresponds to the global minimum for  $N = 24$ , where we colour the coordination of the particles according to the Voronoi tessellation and the distance criterion. Each particle in the packing plays an equivalent role, as they are all at the corner of a square arrangement and touch five other particles. Nevertheless, the Voronoi construction arbitrarily assigns six nearest neighbours to some of the particles. Hence, the Voronoi construction *incorrectly* assigns 12 defects instead of 24 to this packing. This would as a result imply that the packing has no defects at all, which is clearly incorrect as *all* particles

are five-fold defects.

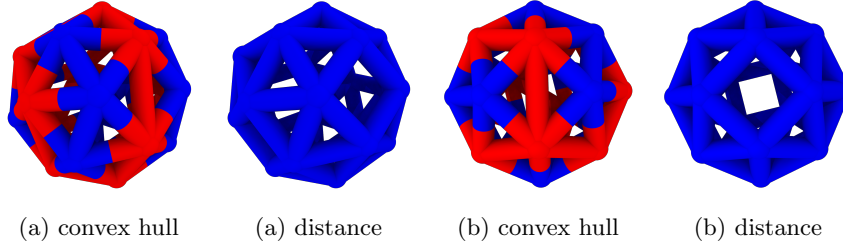

Figure S 1: (Colour online.) Global potential energy minimum for  $N = 24$  Lennard-Jones particles, shown from two vantage points (a) and (b), obtained using the GMIN program.(8) The colour indicates the number of nearest neighbours. Red particles have 6 and blue 5 nearest neighbours, as identified by the convex hull and the distance criterion.

Despite the aforementioned deficiencies of the Voronoi tessellation, it is commonly used in the literature to quantify defects. Therefore, we do present a short analysis of Voronoi tessellation here to allow for easier comparison with said literature. In Fig. S 2 we show the excess defect fraction obtained from the convex hull with the software library CGAL (3). Similar to the distance criterion, we again find that for certain particle numbers, excess defects appear at zero temperature, disappear at intermediate temperatures, then reappear at higher temperatures. This observation suggests that our findings are indeed robust. However, details of the excess defect landscapes calculated from the two methods do vary quite significantly.

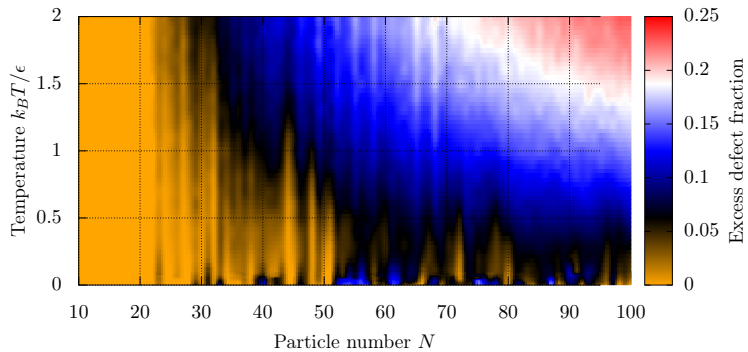

Figure S 2: (Colour online.) Excess defect fraction for  $N = 10$  to  $N = 100$  Lennard-Jones particles determined by means of the convex hull.

For the distance criterion the number of excess defects for a given temperature does not seem to follow a clear trend as a function of the number of particles. However, for the Voronoi tessellations we see a gradual increase in the number of excess defects with increasing  $N$  at fixed temperatures  $T > 1 \epsilon/k_B$ . Furthermore, the total number of excess defects in this construction is significantly smaller over the entire temperature range, because of the previously mentioned deficiencies.

For the Voronoi tessellation the largest excess defect fraction is only 0.25, whereas that for the distance criterion it is about 0.8. This difference is explained by the fact that at high temperatures, the particles are effectively a liquid and there are large fluctuations in inter-particle distances. These large fluctuations lead to a considerable fraction of particles that have other than six nearest neighbours. The convex hull is not sensitive at all to the inter-particle distance, and thus does not reach these large values.

### S 3 Cut-off radii for distance criterion

In this section we present the cut-off radii we used for the nearest neighbour distance criterion. The distances  $r^*$  are chosen to coincide with the minimum after the first peak in the pair distribution function. For those particle numbers  $N$  where the first peak was split, we chose  $r^*$  so that both split peaks are within  $r^*$ . They are tabulated in Tab. S 2.

Table S 2: Cut-off radii used for the distance neighbour criterion for Lennard-Jones particles and Morse particles with shape parameter  $\alpha = 60/r_0$ , where  $r_0$  is the distance at which the pair potential has its minimum.

| $N$ | $r^*$ (LJ) | $r^*$ (Morse) | $N$ | $r^*$ (LJ) | $r^*$ (Morse) |
|-----|------------|---------------|-----|------------|---------------|
| 10  | 1.1522287  | 1.1403504     | 11  | 1.1284720  | 1.1997439     |
| 12  | 1.0750181  | 1.0809568     | 13  | 1.1819259  | 1.0809568     |
| 14  | 1.3500679  | 1.1522287     | 15  | 1.3500679  | 1.0809568     |

*Continued on next page*



Table S 2 – *Continued from previous page*

| $N$ | $r^*$ (LJ) | $r^*$ (Morse) | $N$ | $r^*$ (LJ) | $r^*$ (Morse) |
|-----|------------|---------------|-----|------------|---------------|
| 16  | 1.1700467  | 1.1284720     | 17  | 1.0987748  | 1.0809568     |
| 18  | 1.0631388  | 1.0809568     | 19  | 1.1047144  | 1.0928361     |
| 20  | 1.0572001  | 1.0809568     | 21  | 1.1759863  | 1.0809568     |
| 22  | 1.0572001  | 1.0809568     | 23  | 1.2235006  | 1.0809568     |
| 24  | 1.2710158  | 1.0809568     | 25  | 1.1225324  | 1.1165928     |
| 26  | 1.1581683  | 1.1225324     | 27  | 1.1878647  | 1.0868964     |
| 28  | 1.2472582  | 1.0393821     | 29  | 1.1759863  | 1.0928361     |
| 30  | 1.1581683  | 1.1225324     | 31  | 1.3363481  | 1.1106540     |
| 32  | 1.3363481  | 1.2472582     | 33  | 1.1938043  | 1.1938043     |
| 34  | 1.1522287  | 1.0809568     | 35  | 1.1344107  | 1.1165928     |
| 36  | 1.0809568  | 1.1759863     | 37  | 1.1700467  | 1.0809568     |
| 38  | 1.1700467  | 1.0809568     | 39  | 1.1581683  | 1.1581683     |
| 40  | 1.1819259  | 1.1522287     | 41  | 1.1700467  | 1.1848953     |
| 42  | 1.1700467  | 1.0809568     | 43  | 1.2472582  | 1.1938043     |
| 44  | 1.3363481  | 1.2472582     | 45  | 1.1284720  | 1.2472582     |
| 46  | 1.1819259  | 1.1670773     | 47  | 1.0928361  | 1.2650762     |
| 48  | 1.3363481  | 1.2650762     | 49  | 1.2531978  | 1.2235006     |
| 50  | 1.1284711  | 1.2205312     | 51  | 1.1700467  | 1.2472582     |
| 52  | 1.1819259  | 1.1165928     | 53  | 1.1462900  | 1.2472582     |
| 54  | 1.1581683  | 1.1522260     | 55  | 1.1641080  | 1.1522260     |
| 56  | 1.1759863  | 1.1670773     | 57  | 1.1819259  | 1.1938043     |
| 58  | 1.1403504  | 1.2383492     | 59  | 1.1641080  | 1.2472582     |
| 60  | 1.2353799  | 1.2472582     | 61  | 1.2591366  | 1.2205312     |
| 62  | 1.1878647  | 1.1938043     | 63  | 1.2116223  | 1.2472582     |
| 64  | 1.2413186  | 1.1848953     | 65  | 1.2710158  | 1.2650762     |
| 66  | 1.0750181  | 1.2160768     | 67  | 1.2413186  | 1.1938043     |
| 68  | 1.2650762  | 1.2027133     | 69  | 1.2116223  | 1.1938043     |

*Continued on next page*

Table S 2 – *Continued from previous page*

| $N$ | $r^*$ (LJ) | $r^*$ (Morse) | $N$ | $r^*$ (LJ) | $r^*$ (Morse) |
|-----|------------|---------------|-----|------------|---------------|
| 70  | 1.2472582  | 1.2294402     | 71  | 1.2472582  | 1.1938043     |
| 72  | 1.2918031  | 1.2027133     | 73  | 1.1700467  | 1.2116223     |
| 74  | 1.1641080  | 1.1635137     | 75  | 1.1641080  | 1.1848953     |
| 76  | 1.2027133  | 1.2116223     | 77  | 1.2413186  | 1.2135822     |
| 78  | 1.0868964  | 1.1670773     | 79  | 1.1522287  | 1.1848953     |
| 80  | 1.1670773  | 1.2160768     | 81  | 1.2591366  | 1.2918031     |
| 82  | 1.1700467  | 1.2027133     | 83  | 1.1700467  | 1.2828942     |
| 84  | 1.1047144  | 1.2739852     | 85  | 1.1759863  | 1.3363481     |
| 86  | 1.2413186  | 1.2472582     | 87  | 1.1165928  | 1.2472582     |
| 88  | 1.1047144  | 1.2472582     | 89  | 1.2175619  | 1.1492593     |
| 90  | 1.1047144  | 1.2561672     | 91  | 1.2591366  | 1.2561672     |
| 92  | 1.1938043  | 1.2294402     | 93  | 1.1909445  | 1.2561672     |
| 94  | 1.1878647  | 1.2650762     | 95  | 1.1759863  | 1.2294402     |
| 96  | 1.2531978  | 1.1581683     | 97  | 1.2531978  | 1.2472582     |
| 98  | 1.1789441  | 1.2294402     | 99  | 1.2472582  | 1.2353790     |
| 100 | 1.2365407  | 1.2472582     |     |            |               |

## S 4 Additional figures of particle fractions

This section contains additional figures of particle and defect fractions for the Lennard-Jones and Morse packings. In Fig. S 3 we show the fraction of particles with 7 nearest neighbours, revealing that for a Lennard-Jones potential, exciting seven-fold defects thermally is difficult. The largest fraction of seven-fold particles is about 0.018 for 48 particles at  $T = 2\epsilon/k_B$ .

In Figs. S 4, S 5 and S 6 we show the fraction of particles with three, four and seven nearest neighbours, respectively. Figs. S 4 and S 5 reveal that for

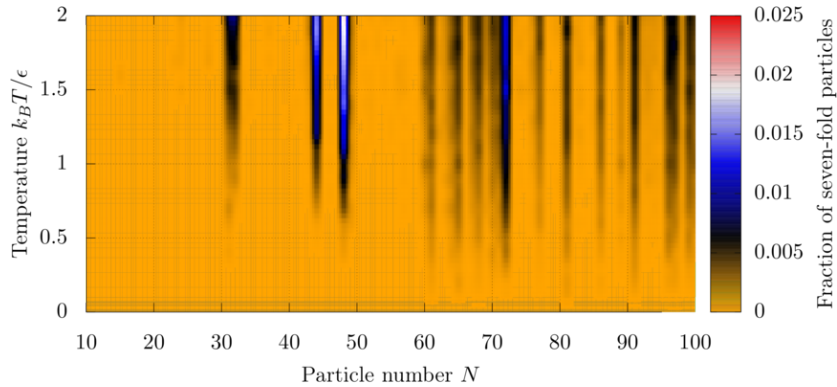

Figure S 3: Fraction of particles with seven nearest neighbours for a Lennard-Jones potential.

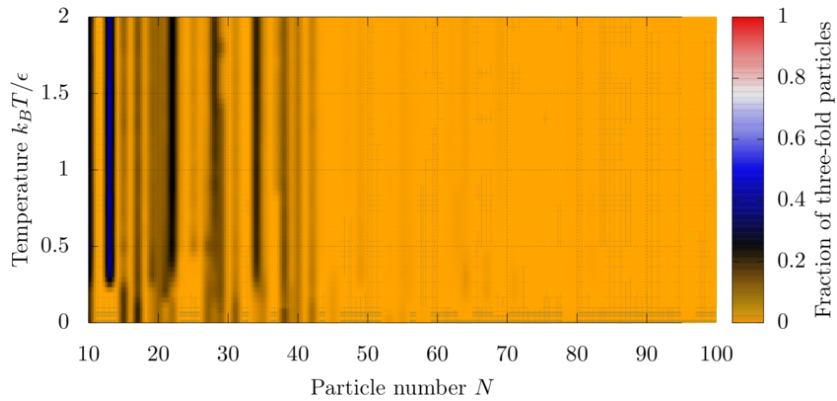

Figure S 4: Fraction of particles with three nearest neighbours for a Morse potential with  $\alpha = 60/r_0$ .

the sharp Morse potential, there is a significant number of particles with three or four nearest neighbours for smaller particle numbers. This is because for this potential, repulsion drives the optimal packings to lower density, which in turn leads to fewer contacts between the particles. This is also evident from the optimal radii for  $N = 11, 12$  and  $13$  particles, since the optimal radius for  $12$  is smaller than that for  $11$  and  $13$  particles.

## S 5 Free energies of packings

This section contains detailed descriptions related to the identification of the packings considered in Section 4. To accurately identify the equilibrium pack-

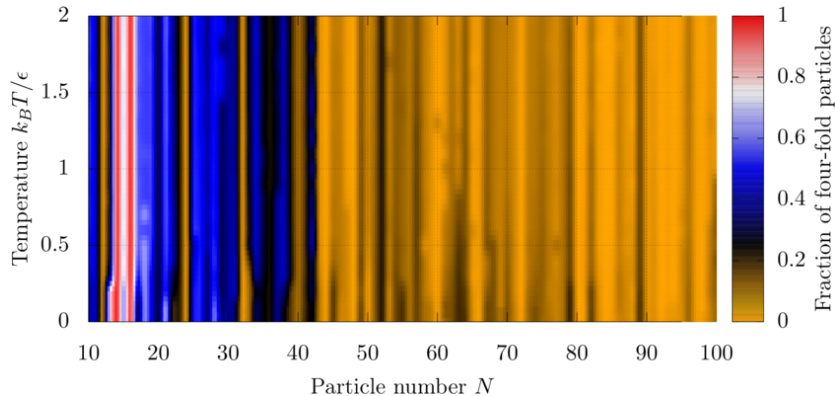

Figure S 5: Fraction of particles with four nearest neighbours for a Morse potential with  $\alpha = 60/r_0$ .

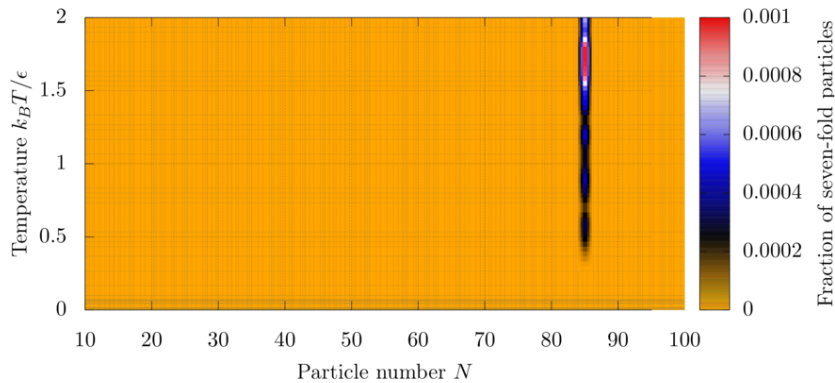

Figure S 6: Fraction of particles with seven nearest neighbours for a Morse potential with  $\alpha = 60/r_0$ .

ing, we average the particle positions over a short time window to average out fast thermal fluctuations. In particular, we average 250 frames 10 time steps apart, which corresponds to time intervals of  $0.05\tau_L$  apart, where  $\tau_L$  is the Langevin damping time. This averaging is performed every 2500 time steps, which corresponds to intervals of  $12.5\tau_L$ .

For each of these averaged snapshots, we determine the number of nearest neighbours of each particle according to the neighbour criterion with  $r^* = 1.2918031r_0$ . For each of these defects, we determine if they are in a defect cluster, where a cluster is defined as all defects that are direct or indirect neighbours of each other. From that information, one can already deduce if the packing is icosahedral,  $D_{5h}$ , or  $D_3$ , since an icosahedral packing contains twelve defect

clusters of one defect each, the  $D_{5h}$  contains five clusters of six defects and two of one defect, and the  $D_3$  packing contains six clusters of one defect and three clusters of six particles.

For additional verification, we determine the root mean square deviation (RMSD) of the particle positions of these snapshots with respect to the identified packing. We do so by assigning to each packing type two axes that are easily obtained from the defect locations. For the  $D_{5h}$ , the first axis is the location of the single five-fold defect and the second axis is the average position of the five-fold defects in the cluster of six. For the  $D_3$ , the main axis is the average position of the three single five-fold defects on the same side of the three clusters of six defects, and the second axis is the average position of one of those clusters of six. For the icosahedral packing, we take as main axis the position of a single five-fold defect and as second axis another defect that makes an angle of  $63.435^\circ$ . Because of fluctuations, we iterate over all vertices and find the pair that deviates the least from this fixed angle. For all packings, we make the axes orthonormal using the Gram-Schmidt procedure.

To extract the RMSD, we first identify the packing based on the defect pattern. Then we find the two axes for the packing as well as the reference packing we identified it with, and rotate the particles so that the two axes of the packing align with the reference. Then, we simply obtain for each particle position  $\mathbf{x}_i$  in the packing the particle position in the reference  $\mathbf{x}_j(i)$  that is closest to it. The RMSD is then simply calculated as

$$\text{RMSD} = \sqrt{\frac{1}{N} \sum_{i=1}^N \|\mathbf{x}_i - \mathbf{x}_j(i)\|^2}.$$

In Fig. S 7a we show the time trace of the RMSD and the fluctuations in the packing type for  $N = 72$  Lennard-Jones particles at  $T = 0.02 \epsilon/k_B$ . Note that the RMSD for the  $D_{5h}$  and  $D_3$  packings are significantly lower than for the icosahedral packing, presumably due to the higher configurational entropy of the icosahedral packing. In Fig. S 7b we show another time trace of the

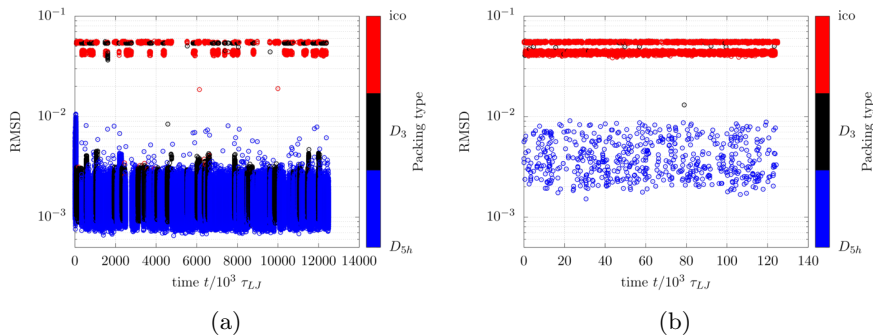

Figure S 7: (Colour online.) Root mean square deviation from assumed packing type at  $T = 0.02 \epsilon/k_B$  (a) and  $T = 0.066 \epsilon/k_B$  (b). Note the different time scale needed for the lower temperature to sample a sufficient number of transitions between the packings.

RMSD, but now for  $T = 0.066 \epsilon/k_B$ , which is close to the temperature used in Ref. (7). Note that in this case the dominant packing is the icosahedral one. The RMSD is higher for all packings due to larger thermal fluctuations. Note furthermore that the rearrangements from  $D_{5h}$  to icosahedral and back are much more frequent at the higher temperature.

For the lower temperatures of  $T = 0.02\epsilon/k_B$  the average occupation fraction of the different states was still in the process of converging, as can be seen from figure S 8. Since the total sampling length for the temperatures  $T \leq 0.03\epsilon/k_B$  was ten times longer, we see that increasing the temperature from  $T = 0.02\epsilon/k_B$  to  $T = 0.05\epsilon/k_B$  leads to convergence more than ten times as fast, from which it becomes clear that the frequency of rearrangements for Lennard-Jones packings increases very rapidly with temperature.

With the analysis described here, we can determine the packing for each frame, and from this we construct occurrence frequencies for each packing. Under the assumption that the simulations are ergodic, these can be converted into free energy differences, as explained in the main text.

For the Morse potential the above procedure is not viable at low temperatures, presumably because the energy barriers between the packings are much larger. To emphasise this, we show in Fig. S 9 the frequency of observed switches between the low energy packings per simulation time for  $N = 72$  for

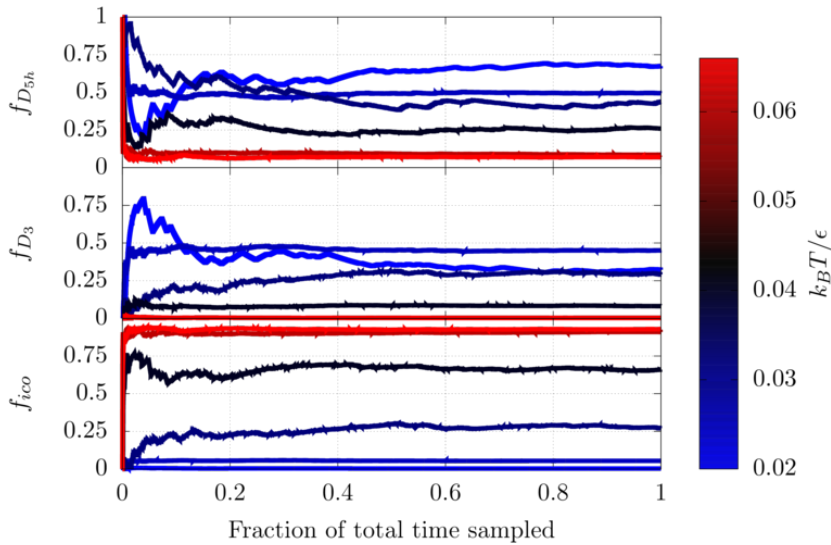

Figure S 8: Converging of the observed frequency of the different packings with the fraction of total time sampled. The lower temperatures  $T \leq 0.03\epsilon/k_B$  had a total sample time ten times longer than that of the higher temperatures.

both the Lennard-Jones and Morse particles. The low energy packings are shown in Figs. 3 for Lennard-Jones and 9 for Morse. Note that the Lennard-Jones packing exhibits a maximum at around  $T = 0.03\epsilon/k_B$ . This is because at this point all three packings are roughly equally likely. The Morse packings only show significant rearrangements for  $T > 0.75 \epsilon/k_B$ , even though the potential energy difference between the two packings is of a similar order as the potential energy difference between the Lennard-Jones  $D_{5h}$  and icosahedral packings ( $\approx 1.6 \times 10^{-3}\epsilon$  for Lennard-Jones against  $1.58 \times 10^{-3}\epsilon$  for Morse). This hints at a much larger kinetic barrier between the packings, and thus a simple sampling of the frequencies is not a viable approach to determine the free energy of the packings.

## References

- [1] Jeroen M. Voogd. *Crystallisation on a Sphere*. PhD thesis, Universiteit van Amsterdam, 1994.
- [2] Kevin Q. Brown. Voronoi diagrams from convex hulls. *Information Processing*

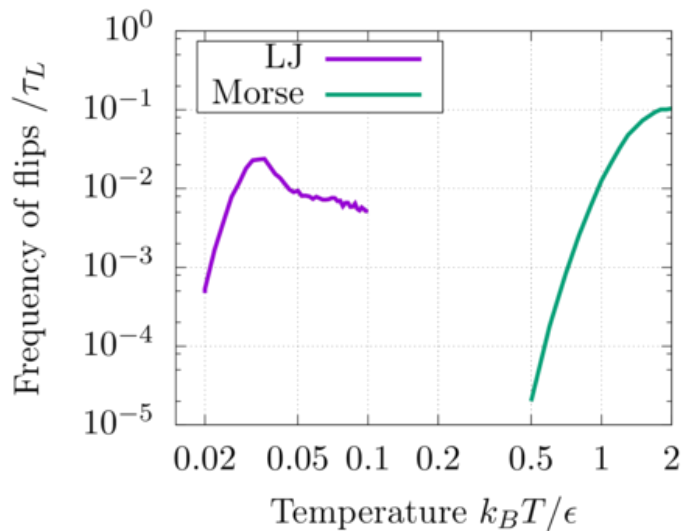

Figure S 9: (Colour online.) Observed frequency of switches between packings. Note that for the low temperatures, the Morse packing does not exhibit any switches at all in the sampled time.

*Letters*, 9:223–228, 1978.

- [3] The CGAL Project. *CGAL User and Reference Manual*. CGAL Editorial Board, 4.7 edition, 2015.
- [4] J. P. Troadec, A. Gervois, and L. Oger. Statistics of voronoi cells of slightly perturbed face-centered cubic and hexagonal close-packed lattices. *EPL (Europhysics Letters)*, 42(2):167, 1998.
- [5] David J. Wales and Sidika Ulker. Structure and dynamics of spherical crystals characterized for the thomson problem. *Phys. Rev. B*, 74:212101, Dec 2006.
- [6] David J. Wales, Hayley McKay, and Eric L. Altschuler. Defect motifs for spherical topologies. *Phys. Rev. B*, 79:224115, Jun 2009.
- [7] Roya Zandi, David Reguera, Robijn F. Bruinsma, William M. Gelbart, and Joseph Rudnick. Origin of icosahedral symmetry in viruses. *PNAS*, 101(44):15556–15560, Nov 2004.
- [8] David J. Wales. Gmin, 2015. Downloaded on August 20th, 2015 from <http://www-wales.ch.cam.ac.uk/GMIN/>.
